# Supplementary material for: Nox4-Mediated Cell Signaling Regulates Differentiation and Survival of Neural Crest Stem Cells
Source: PubMed Central journal article supplement — Mol Cells. 2014 Nov 10;37(12):907–11. doi: 10.14348/molcells.2014.0244 (PMC4275708; doi:10.14348/molcells.2014.0244), 2014-11-10
Supplement: molcell-37-12-907-911-supplementary.pdf [file molcell-37-12-907-911-supplementary.pdf]

**Figure S1. Size-matched Nox4<sup>+/+</sup> and Nox4<sup>-/-</sup> mice examined by RNA in situ hybridization with anti-sense probe specific for NeuroD. Normal development of cranial and dorsal root ganglia is seen regardless of the genotype.**

Lee et al. Figure S1

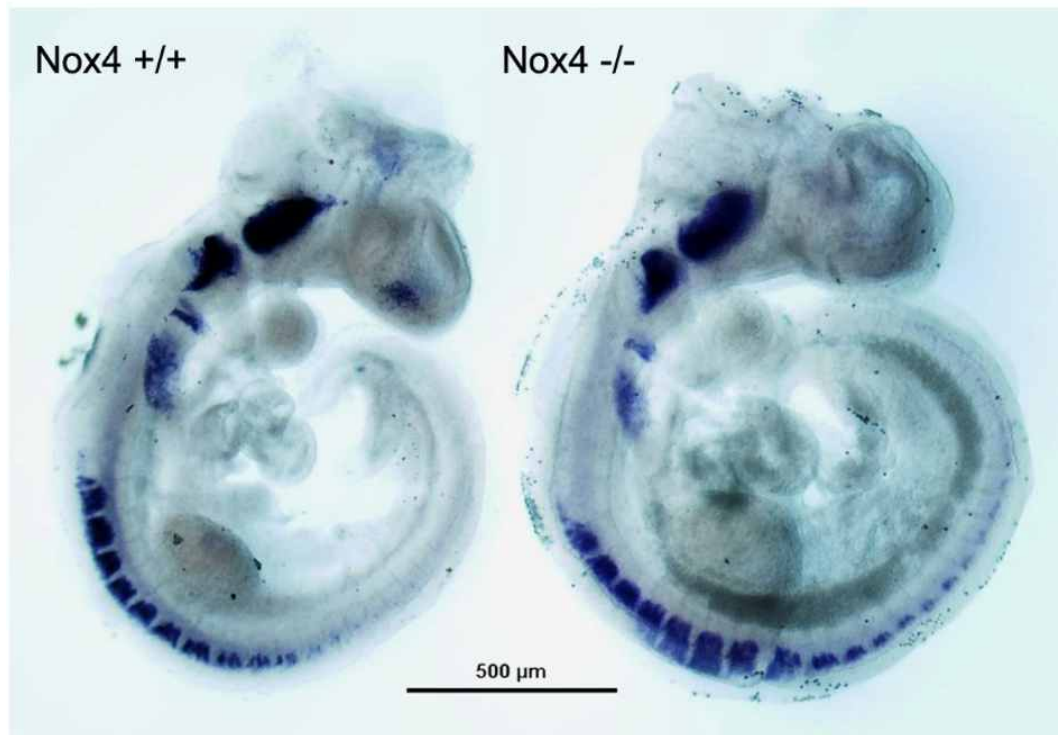

**Table S1. RTPCR oligonucleotide primers for rat Nox isozymes**

| <b>Gene (RefSeq ID)</b>    | <b>Sequence</b>                       |
|----------------------------|---------------------------------------|
| <b>Nox1 (NM_053683)</b>    | sense - CACCTGCTCATTTTGCAACCACAC      |
|                            | antisense - CAACTCCTTTCATACTTATCCCCTC |
| <b>Nox2 (NM_023965)</b>    | sense - TCACATCCTCCACCAAACC           |
|                            | antisense - GTATTGTCCCACCTCCATCC      |
| <b>Nox3 (NM_001004216)</b> | sense - ATGCCGAGACTGGCAGTGGA          |
|                            | antisense - CATCCAGACTTTCATCCCAGTG    |
| <b>Nox4 (NM_053524)</b>    | sense - CTCTACTGGATGACTGGAAACC        |
|                            | antisense - GTCCCATATGAGTTGTTCCGGT    |
| <b>Duox1 (NM_153739)</b>   | sense - GGAAGTGCCGGAAGTGATCAAG        |
|                            | antisense - TAGTATCGGTGATGCCGCTGTGG   |
| <b>Duox2 (NM_024141)</b>   | sense - AGGCACCGGGGACATCTTTAAG        |
|                            | antisense - GGTTTCTTCAATGTCCGTGGGT    |
| <b>GAPDH (NM_017008)</b>   | sense - ACCACAGTCCATGCCATCAC          |
|                            | antisense - TCCACCACCCTGTTGCTGTA      |

**Table S2. Nox4 knockout mouse genotyping primers**

|              |                            |
|--------------|----------------------------|
| WT-sense     | 5' TCTCTGATGAGTTACCAAGG 3' |
| KO-sense     | 5' CGAATATCATGGTGGAAAAT 3' |
| WT-Antisense | 5' GAGCAAAAGCACTAACGTAG 3' |
